# Supplementary material
Source: HighWire-hosted journal article supplement (http://www.cmaj.ca/highwire/filestream/59087/field_highwire_adjunct_files/0/1347-ref.pdf)
Supplement: 1347-ref.pdf [file 1347-ref.pdf]

## Appendix 1: References

1. Sayre MR, Koster RW, Botha M, et al. 2010 International consensus on cardiopulmonary resuscitation and emergency cardiovascular care science with treatment recommendation. *Circulation* 2010;122(Suppl 2):S298-324.
2. Vaillancourt C, Epstein N, Cheskes S, et al. CAEP position statement on bystander cardiopulmonary resuscitation. *CJEM* 2011;13:339-46.
3. Hüpfl M, Selig H, Nagele P. Chest-compression-only versus standard cardiopulmonary resuscitation: a meta-analysis. *Lancet* 2010;376:1552-7.
4. Bobrow BJ, Spaite DW, Berg RA, et al. Chest-compression-only CPR by lay rescuers and survival from out-of-hospital cardiac arrest. *JAMA* 2010;304:1447-54.
5. Orkin AM. Push hard, push fast, if you're downtown: a citation review of urban-centrism in American and European basic life support guidelines. *Scand J Trauma Resus Emerg Med* 2013; 21:32.
6. Ogawa T, Akahane M, Koike S, et al. Outcomes of chest- compression-only CPR versus conventional CPR conducted by laypeople in patients with out-of-hospital cardiopulmonary arrest witnessed by bystanders: nationwide population-based observational study. *BMJ* 2011;342:c7106.
7. Panchal AR, Bobrow BJ, Spaite DW, et al. Chest-compression-only cardiopulmonary resuscitation performed by lay rescuers for adult out-of-hospital cardiac arrest due to noncardiac etiologies. *Resuscitation* 2013;84:435-9.
8. Kitamura T, Iwami T, Kawamura T, et al. Conventional and chest-compression-only cardiopulmonary resuscitation by bystanders for children who have out-of-hospital cardiac arrests: a prospective, nationwide, population-based cohort study. *Lancet* 2010;375:1347-54.
9. Guildner CW. Resuscitation — Opening the airway. A comparative study of techniques for opening an airway obstructed by the tongue. *JACEP* 1976;5:588-90.
10. Deakin CD, O'Neill JF, Tabor T. Does compression-only cardiopulmonary resuscitation generate adequate passive ventilation during cardiac arrest? *Resuscitation* 2007;75:53-9.
11. Bobrow BJ, Ewy GA, Clark L, et al. Passive oxygen insufflation is superior to bag-valve-mask ventilation for witnessed ventricular fibrillation out-of-hospital cardiac arrest. *Ann Emerg Med* 2009;54:656-62.
12. *How to perform CPR*. Washington (DC): American College of Emergency Physicians; 2008. Available: [www.emergencycarefor you.org/EmergencyManual/HowToPerformCPR/Default.aspx](http://www.emergencycarefor you.org/EmergencyManual/HowToPerformCPR/Default.aspx) (accessed 2014 Mar. 10).
13. Kellum MJ, Kennedy KW, Barney R, et al. Cardiocerebral resuscitation improves neurologically intact survival of patients with out-of-hospital cardiac arrest. *Ann Emerg Med* 2008;52:244-52.
